# Supplementary material
Source: PubMed Central journal article supplement (PMC4456277)
Supplement: NIHMS676551-supplement-6.pdf [file NIHMS676551-supplement-6.pdf]

| Supplemental Table 1: qPCR Primer List |                            |
|----------------------------------------|----------------------------|
| p53 F:                                 | GGGGAGGAGCCAGGCCATCA       |
| p53 R:                                 | CCGCGCCATGGCCATCTACA       |
| p21 F:                                 | CTAGGGGAATTGGAGTCAGG       |
| p21 R:                                 | AGAGACAACGGCACACTTTG       |
| Puma F:                                | GCGGCGGAGACAAGAAGA         |
| Puma R:                                | AGTCCCATGAAGAGATTGTACATGAC |
| Noxa F:                                | GCAGAGCTACCACCTGAGTTC      |
| Noxa R:                                | CTTTTGCGACTTCCCAGGCA       |
| Bax F:                                 | TGAAGACAGGGGCCTTTTTG       |
| Bax R:                                 | AATTCGCCGGAGACACTCG        |
| Mdm2 F:                                | CTGTGTCTACCGAGGGTGCT       |
| Mdm2R:                                 | CGCTCCAACGGACTTTAACA       |
| B-Actin F:                             | TCCTAGCACCATGAAGATCAAGATC  |
| B-Actin R:                             | CTGCTTGCTGATCCACATCTG      |
| Siva F:                                | ACACGGTGCCAAGCTCAGGC       |
| Siva R:                                | CACACTGCCACACAGGGCC        |
| hSiva F:                               | GTGAGCCAGAGGGAGTTGAG       |
| hSiva R:                               | ACAGGAGTCGCTTGGTCTTC       |
| Cytochrome B F:                        | TGAGGGGGCTTCTCAGTAGA       |
| Cytochrome B R:                        | TAGGGCCGCGATAATAAATG       |
| 16s rRNA F:                            | GGGATAACAGCGCAATCCTA       |
| 16s rRNA R:                            | ATTGGGATGTCCTGATCCAA       |
| Cox III F:                             | TAACCCTTGGCCTACTCACC       |
| Cox III R:                             | ATAGGAGTGTGGTGGCCTTG       |
| $\beta$ 2- $\mu$ globulin F:           | TCATTAGGGAGGAGCCAATG       |
| $\beta$ 2- $\mu$ globulin R:           | ATCCCCTTTCGTTTTTGCTT       |
