# Supplementary material
Source: PubMed Central journal article supplement (PMC4456277)

# Supplemental Figure 1

A

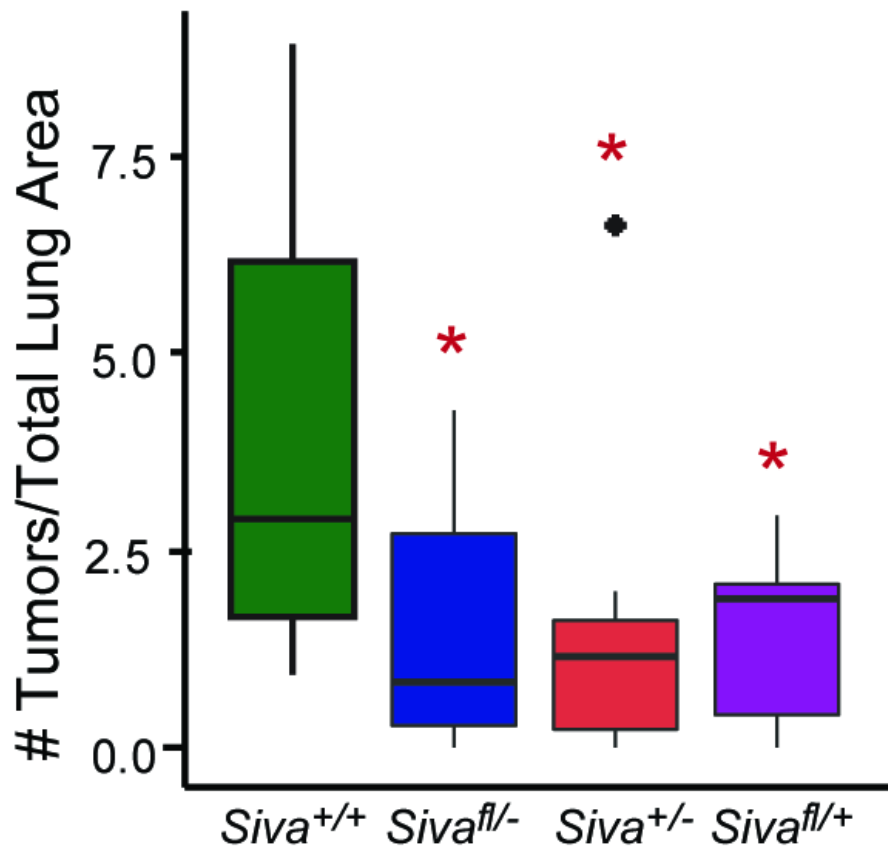

B

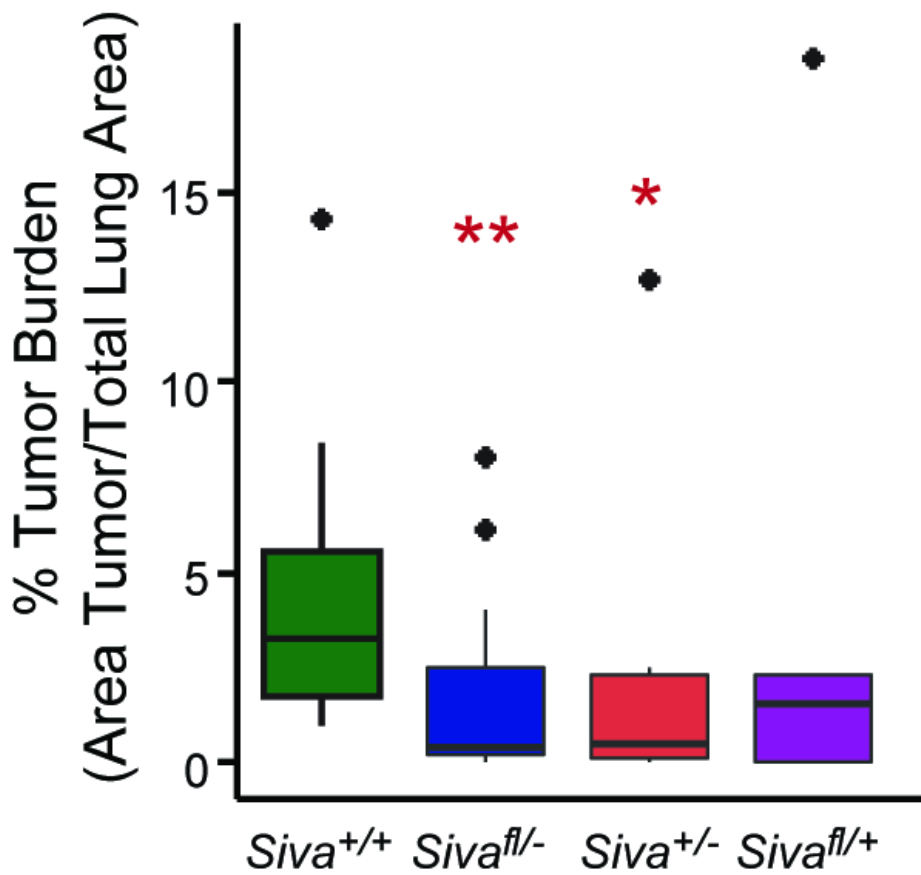

Supplement: NIHMS676551-supplement-2.pdf [file NIHMS676551-supplement-2.pdf]

# Supplemental Figure 3

A

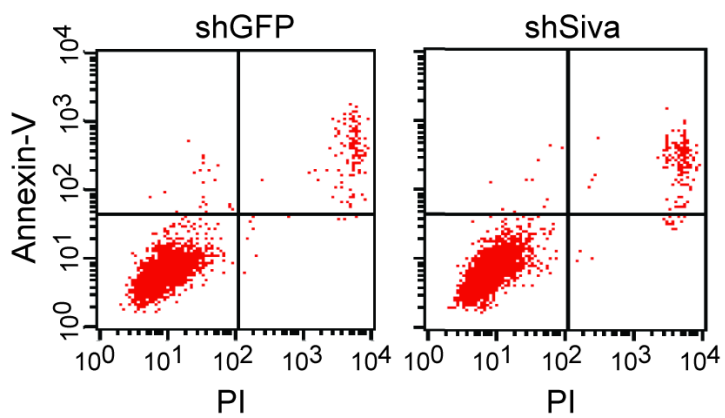

B

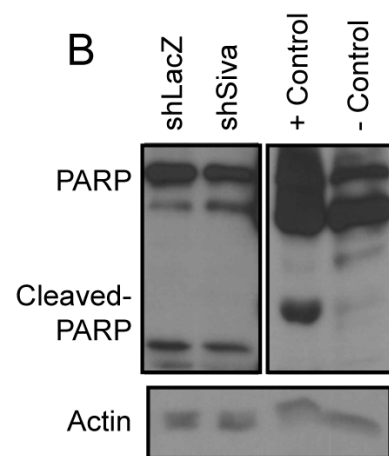

Supplement: NIHMS676551-supplement-4.pdf [file NIHMS676551-supplement-4.pdf]

# Supplemental Figure 4.

A

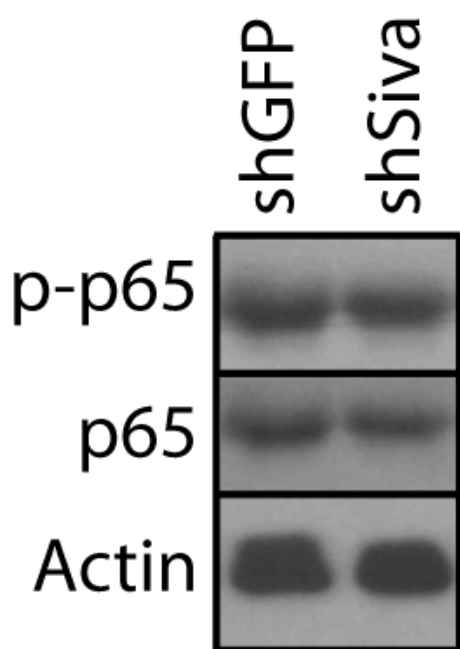

B

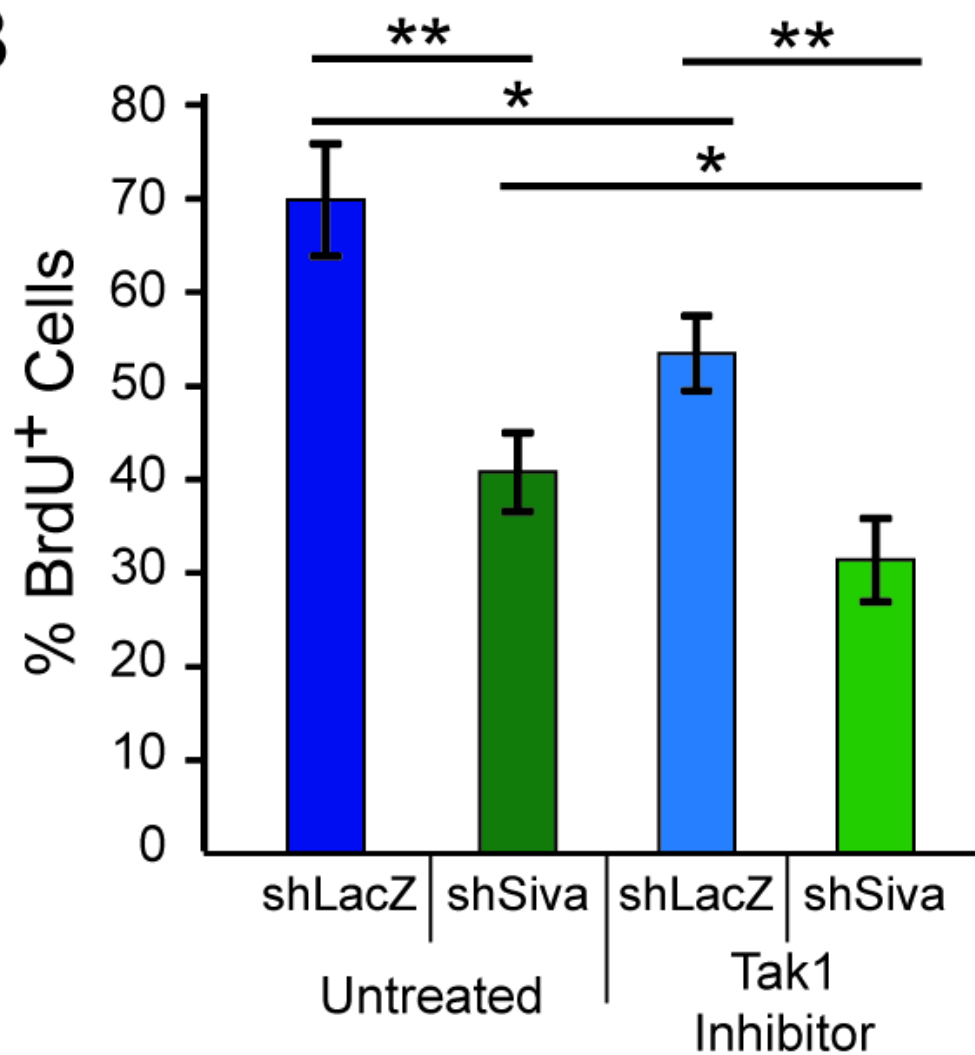

Supplement: NIHMS676551-supplement-5.pdf [file NIHMS676551-supplement-5.pdf]
